# Supplementary material for: Validating an Instrument for Measuring Newly Graduated Nurses’ Adaptation
Source: MDPI journal article supplement (doi:10.3390/ijerph20042860), 2023-02-06
Supplement: s1 [file s1]

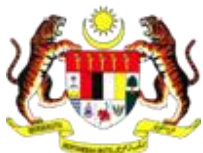

**QUESTIONNAIRE ON DETERMINANTS INFLUENCING EFFECTIVE  
TRANSITION ADAPTATION BEHAVIOUR OF NEWLY EMPLOYED  
NURSES IN MINISTRY OF HEALTH HOSPITALS NURSES IN MINISTRY  
OF HEALTH HOSPITALS**

|  |  |  |  |  |
|--|--|--|--|--|
|  |  |  |  |  |
|--|--|--|--|--|

*For office use only*

**SECTION A: GENERAL INFORMATION**

A001 Age: \_\_\_\_\_

A002 Gender

1. Man

2. Women

|  |
|--|
|  |
|  |

A003 Ethnicity: \_\_\_\_\_

A004 Religion: \_\_\_\_\_

A005 Marital Status:

Never married

Married

Divorced

Cohabiting

|  |
|--|
|  |
|  |
|  |
|  |

A006 No. of children: \_\_\_\_\_

## SECTION A1: EMPLOYMENT INFORMATION, BOTH PREVIOUS AND CURRENT

A007 Grade and profession \_\_\_\_\_

A008 Place of Work \_\_\_\_\_

A009 Department or Unit \_\_\_\_\_

A010 When did you start serving in the MOH? \_\_\_\_\_Month\_\_\_\_\_Year

A011 When did you start serving in the current department or unit? \_\_\_\_\_Month\_\_\_\_\_Year

A012 When have you graduated? \_\_\_\_\_Month\_\_\_\_\_Year

A013 Period of unemployment after graduation \_\_\_\_\_Month\_\_\_\_\_Year

|      |                                               |               |                      |                   |                      |
|------|-----------------------------------------------|---------------|----------------------|-------------------|----------------------|
| A014 | Do you have work experience after graduation? | Yes           | <input type="text"/> | No                | <input type="text"/> |
|      | If Yes, state your field of work              | Health Sector | <input type="text"/> | Non-health Sector | <input type="text"/> |
| A015 | Do you intend to resign from your job?        | Yes           | <input type="text"/> | No                | <input type="text"/> |

| Section B: NURSING EDUCATION PROGRAM |                 |                                           |              |                       |
|--------------------------------------|-----------------|-------------------------------------------|--------------|-----------------------|
| 1                                    | 2               | 3                                         | 4            | 5                     |
| <i>Strongly disagree</i>             | <i>Disagree</i> | <i>Neither<br/>Disagree nor<br/>Agree</i> | <i>Agree</i> | <i>Strongly agree</i> |

| B1: Learning Environment                       |                                                                                                                                                                   |   |   |   |   |   |
|------------------------------------------------|-------------------------------------------------------------------------------------------------------------------------------------------------------------------|---|---|---|---|---|
| B001                                           | Staff nurses facilitate me in during the practical.                                                                                                               | 1 | 2 | 3 | 4 | 5 |
| B002                                           | I am accepted as a learner, encouraged to ask questions in contributing to patient/client care                                                                    | 1 | 2 | 3 | 4 | 5 |
| B003                                           | Members of the multidisciplinary team contribute to my learning experience                                                                                        | 1 | 2 | 3 | 4 | 5 |
| B004                                           | Instructors used teaching aids to assist student's understanding in the class                                                                                     | 1 | 2 | 3 | 4 | 5 |
| B005                                           | Instructors able to explain well on the teaching topic                                                                                                            | 1 | 2 | 3 | 4 | 5 |
| B2: Classroom Component During Nursing Program |                                                                                                                                                                   |   |   |   |   |   |
| B006                                           | The classroom component of my nursing education programme adequately prepared me to recognise the desired actions, side effects, and interactions of medications. | 1 | 2 | 3 | 4 | 5 |
| B007                                           | The classroom component of my nursing education programme adequately prepared me to analyse multiple types of data when making client-related decisions.          | 1 | 2 | 3 | 4 | 5 |
| B008                                           | The classroom component of my nursing education programme adequately prepared me to understand the pathophysiology underlying clients' conditions.                | 1 | 2 | 3 | 4 | 5 |
| B3: Teacher Characteristic                     |                                                                                                                                                                   |   |   |   |   |   |
| B009                                           | The instructors help me link theory with clinical practice.                                                                                                       | 1 | 2 | 3 | 4 | 5 |
| B010                                           | The instructors keep professionals with students                                                                                                                  | 1 | 2 | 3 | 4 | 5 |
| B011                                           | The instructors were rigid in rule implementation.                                                                                                                | 1 | 2 | 3 | 4 | 5 |
| B012                                           | The instructor discusses my learning needs with me.                                                                                                               | 1 | 2 | 3 | 4 | 5 |
| B4: Clinical Teacher Role                      |                                                                                                                                                                   |   |   |   |   |   |
| B013                                           | The Clinical Facilitator assisted in my interactions with unit staff to ensure that I was provided with timely and constructive feedback.                         | 1 | 2 | 3 | 4 | 5 |
| B014                                           | The clinical facilitator, through negotiation with the unit staff, helped me achieve my learning goals.                                                           | 1 | 2 | 3 | 4 | 5 |
| B015                                           | The clinical facilitator showed genuine concern for my progress and needs.                                                                                        | 1 | 2 | 3 | 4 | 5 |

| Section C: WORKPLACE ORGANISATION |                 |                                           |              |                       |
|-----------------------------------|-----------------|-------------------------------------------|--------------|-----------------------|
| 1                                 | 2               | 3                                         | 4            | 5                     |
| <i>Strongly disagree</i>          | <i>Disagree</i> | <i>Neither<br/>Disagree nor<br/>Agree</i> | <i>Agree</i> | <i>Strongly agree</i> |

| C1: Superior/Mentor Role                            |                                                                                            |   |   |   |   |   |
|-----------------------------------------------------|--------------------------------------------------------------------------------------------|---|---|---|---|---|
| B001                                                | My supervisor treats me and my colleagues fairly.                                          | 1 | 2 | 3 | 4 | 5 |
| B002                                                | My supervisor distributes the work fairly and impartially                                  | 1 | 2 | 3 | 4 | 5 |
| B003                                                | If needed, I can get support and help from my supervisors                                  | 1 | 2 | 3 | 4 | 5 |
| B004                                                | My supervisor encourages me to develop my nursing skills                                   | 1 | 2 | 3 | 4 | 5 |
| B005                                                | My supervisor tackles problems as soon as they surface.                                    | 1 | 2 | 3 | 4 | 5 |
| B006                                                | My supervisor is concerned about the welfare of the subordinates.                          | 1 | 2 | 3 | 4 | 5 |
| B007                                                | My supervisors and doctors support me when I take appropriate risks, even those that fail. | 1 | 2 | 3 | 4 | 5 |
| B008                                                | My supervisor gives me help and support in getting the job done.                           | 1 | 2 | 3 | 4 | 5 |
| B009                                                | My supervisor treats my mistakes as opportunities for me to learn and improve.             | 1 | 2 | 3 | 4 | 5 |
| C2: Organisational Support and Teamwork Integration |                                                                                            |   |   |   |   |   |
| B010                                                | This organisation is a great place to work                                                 | 1 | 2 | 3 | 4 | 5 |
| B011                                                | This organisation really inspires me to give my very best job performance                  | 1 | 2 | 3 | 4 | 5 |
| B012                                                | The training and development I've received have improved my performance.                   | 1 | 2 | 3 | 4 | 5 |
| B013                                                | I am participating in the working group or in a team.                                      | 1 | 2 | 3 | 4 | 5 |
| B014                                                | Working in the group helps you learn more about nursing practice.                          | 1 | 2 | 3 | 4 | 5 |
| B015                                                | The work environment always supports my duty and its execution.                            | 1 | 2 | 3 | 4 | 5 |
| B016                                                | I am satisfied with the work I do                                                          | 1 | 2 | 3 | 4 | 5 |
| B017                                                | Workers are encouraged to think of ways to do things better at the workplace.              | 1 | 2 | 3 | 4 | 5 |

| Section C: WORKPLACE ORGANISATION |                 |                                           |              |                       |
|-----------------------------------|-----------------|-------------------------------------------|--------------|-----------------------|
| 1                                 | 2               | 3                                         | 4            | 5                     |
| <i>Strongly disagree</i>          | <i>Disagree</i> | <i>Neither<br/>Disagree nor<br/>Agree</i> | <i>Agree</i> | <i>Strongly agree</i> |

| C3: Socioemotional Support |                                                                                                                                   |   |   |   |   |   |
|----------------------------|-----------------------------------------------------------------------------------------------------------------------------------|---|---|---|---|---|
| B018                       | There is sufficient communication in my department                                                                                | 1 | 2 | 3 | 4 | 5 |
| B019                       | If needed, I can talk with my friends about work-related problems                                                                 | 1 | 2 | 3 | 4 | 5 |
| B020                       | My supervisor gives me enough feedback to help me improve my clinical practice                                                    | 1 | 2 | 3 | 4 | 5 |
| B021                       | I am satisfied with my ability to solve problems at work                                                                          | 1 | 2 | 3 | 4 | 5 |
| C4: Job Discrimination     |                                                                                                                                   |   |   |   |   |   |
| B022                       | The discrimination in my office affects my job and job skills.                                                                    | 1 | 2 | 3 | 4 | 5 |
| B023                       | Harassment and discrimination are prevented at my workplace                                                                       | 1 | 2 | 3 | 4 | 5 |
| B024                       | The work load affects my job and skills.                                                                                          | 1 | 2 | 3 | 4 | 5 |
| B025                       | My colleague's interference affects my job and skills.                                                                            | 1 | 2 | 3 | 4 | 5 |
| C5: Work Readiness         |                                                                                                                                   |   |   |   |   |   |
| B026                       | I know in advance what kind of tasks to expect a month from now                                                                   | 1 | 2 | 3 | 4 | 5 |
| B027                       | I feel it is necessary to demonstrate my ability and competence to others in order to be assigned to attractive tasks or projects | 1 | 2 | 3 | 4 | 5 |
| B028                       | I know what has to be learned and which new skills have to be acquired in order to gain skills in my job                          | 1 | 2 | 3 | 4 | 5 |
| C6: Role Function          |                                                                                                                                   |   |   |   |   |   |
| B029                       | My job is routine every day                                                                                                       | 1 | 2 | 3 | 4 | 5 |
| B030                       | I have the ability to choose what and how I do my work.                                                                           | 1 | 2 | 3 | 4 | 5 |
| B031                       | I am clear about the scope of work, goals, and objectives in my work                                                              | 1 | 2 | 3 | 4 | 5 |
| C7: Work Characteristic    |                                                                                                                                   |   |   |   |   |   |
| B032                       | Any inequalities at my workplace have been addressed.                                                                             | 1 | 2 | 3 | 4 | 5 |
| B033                       | Usually my working hours extend beyond the actual working hours.                                                                  | 1 | 2 | 3 | 4 | 5 |

| Section D: PERSONALITY TRAITS |                 |                                           |              |                       |
|-------------------------------|-----------------|-------------------------------------------|--------------|-----------------------|
| 1                             | 2               | 3                                         | 4            | 5                     |
| <i>Strongly disagree</i>      | <i>Disagree</i> | <i>Neither<br/>Disagree nor<br/>Agree</i> | <i>Agree</i> | <i>Strongly agree</i> |

| D1: Proactive       |                                                                               |   |   |   |   |   |
|---------------------|-------------------------------------------------------------------------------|---|---|---|---|---|
| B001                | I try to pinpoint what I need to succeed.                                     | 1 | 2 | 3 | 4 | 5 |
| B002                | After attaining a goal, I look for another, more challenging one.             | 1 | 2 | 3 | 4 | 5 |
| B003                | I always try to find a way to work around obstacles; nothing really stops me. | 1 | 2 | 3 | 4 | 5 |
| B004                | When I encounter a problem, I take the initiative to solve it.                | 1 | 2 | 3 | 4 | 5 |
| B005                | Changes in routine are interesting to me                                      | 1 | 2 | 3 | 4 | 5 |
| B006                | If someone tells me I can't do something, I can be sure I will do it.         | 1 | 2 | 3 | 4 | 5 |
| D2: Hardiness Scale |                                                                               |   |   |   |   |   |
| B007                | Things go in my life depends on my own actions                                | 1 | 2 | 3 | 4 | 5 |
| B008                | The majority of my time is spent doing meaningful things.                     | 1 | 2 | 3 | 4 | 5 |
| B009                | By working hard, I can nearly always achieve my goals                         | 1 | 2 | 3 | 4 | 5 |
| B010                | In uncertain times, I usually expect the best.                                | 1 | 2 | 3 | 4 | 5 |
| B011                | Most days, life is really interesting and exciting for me                     | 1 | 2 | 3 | 4 | 5 |
| B012                | I'm always optimistic about my future.                                        | 1 | 2 | 3 | 4 | 5 |

| Section D: PERSONALITY TRAITS |                 |                                           |              |                       |
|-------------------------------|-----------------|-------------------------------------------|--------------|-----------------------|
| 1                             | 2               | 3                                         | 4            | 5                     |
| <i>Strongly disagree</i>      | <i>Disagree</i> | <i>Neither<br/>Disagree nor<br/>Agree</i> | <i>Agree</i> | <i>Strongly agree</i> |

| D3: Optimism    |                                                                                                 |   |   |   |   |   |
|-----------------|-------------------------------------------------------------------------------------------------|---|---|---|---|---|
| B013            | I don't like to make changes in my regular activities                                           | 1 | 2 | 3 | 4 | 5 |
| B014            | I hardly ever expect things to go my way.                                                       | 1 | 2 | 3 | 4 | 5 |
| B015            | At times, I think I am no good at all                                                           | 1 | 2 | 3 | 4 | 5 |
| B016            | I often find it difficult to express empathy with patients                                      | 1 | 2 | 3 | 4 | 5 |
| B017            | Overall, I expect more good things to happen to me than bad.                                    | 1 | 2 | 3 | 4 | 5 |
| D4: Caring      |                                                                                                 |   |   |   |   |   |
| B018            | I am confident in my ability to express concern for my patients.                                | 1 | 2 | 3 | 4 | 5 |
| B019            | It is easy for me to consider the many facets of a patient's care while I am listening to them. | 1 | 2 | 3 | 4 | 5 |
| B020            | I have the ability to restore a sense of normalcy in stressful situations.                      | 1 | 2 | 3 | 4 | 5 |
| D5: Self-Esteem |                                                                                                 |   |   |   |   |   |
| B021            | I feel that I'm a person of worth, at least on an equal plane with others                       | 1 | 2 | 3 | 4 | 5 |
| B022            | I am able to do things as well as most other people                                             | 1 | 2 | 3 | 4 | 5 |
| B023            | On the whole, I am satisfied with myself.                                                       | 1 | 2 | 3 | 4 | 5 |
| B024            | I wish I could have more respect for myself.                                                    | 1 | 2 | 3 | 4 | 5 |

| Section D: NEWLY EMPLOYED NURSES' ADAPTATION |                 |                                           |              |                       |
|----------------------------------------------|-----------------|-------------------------------------------|--------------|-----------------------|
| 1                                            | 2               | 3                                         | 4            | 5                     |
| <i>Strongly disagree</i>                     | <i>Disagree</i> | <i>Neither<br/>Disagree nor<br/>Agree</i> | <i>Agree</i> | <i>Strongly agree</i> |

| E1: Work Performance |                                                                  |   |   |   |   |   |
|----------------------|------------------------------------------------------------------|---|---|---|---|---|
| B001                 | Administering intravenous medications (or into intravenous bags) | 1 | 2 | 3 | 4 | 5 |
| B002                 | Administering oral medications                                   | 1 | 2 | 3 | 4 | 5 |
| B003                 | Administering blood transfusion                                  | 1 | 2 | 3 | 4 | 5 |
| B004                 | Performing urinary catheter insertion and care                   | 1 | 2 | 3 | 4 | 5 |
| B005                 | Performing sterile techniques                                    | 1 | 2 | 3 | 4 | 5 |
| B006                 | Performing postural drainage and percussion, and oxygen therapy  | 1 | 2 | 3 | 4 | 5 |
| B007                 | Performing preoperation/postoperation care                       | 1 | 2 | 3 | 4 | 5 |
| B008                 | Performing tracheotomy care                                      | 1 | 2 | 3 | 4 | 5 |
| B009                 | Performing nasogastric tube feeding and care                     | 1 | 2 | 3 | 4 | 5 |
| B010                 | Performing chest tube care with underwater seal management       |   |   |   |   |   |
| B011                 | Performing wound dressing care                                   |   |   |   |   |   |
| E2: Job Satisfaction |                                                                  |   |   |   |   |   |
| B012                 | I am proud of my current job.                                    | 1 | 2 | 3 | 4 | 5 |
| B013                 | The provision of nursing care is what I like to do               | 1 | 2 | 3 | 4 | 5 |
| B014                 | I clearly understand my problems and challenges at work.         | 1 | 2 | 3 | 4 | 5 |
| B015                 | Working in this hospital helps me improve nursing practice.      | 1 | 2 | 3 | 4 | 5 |
| B016                 | Helping patients recover motivates me to work as a nurse.        | 1 | 2 | 3 | 4 | 5 |
| B017                 | I can consult with other professionals on patient care.          | 1 | 2 | 3 | 4 | 5 |
| B018                 | I sometimes receive praise and recognition from colleagues       | 1 | 2 | 3 | 4 | 5 |
| B019                 | I can balance work with my private life.                         | 1 | 2 | 3 | 4 | 5 |



| Section D: NEWLY EMPLOYED NURSES' ADAPTATION |                 |                                           |              |                       |
|----------------------------------------------|-----------------|-------------------------------------------|--------------|-----------------------|
| 1                                            | 2               | 3                                         | 4            | 5                     |
| <i>Strongly disagree</i>                     | <i>Disagree</i> | <i>Neither<br/>Disagree nor<br/>Agree</i> | <i>Agree</i> | <i>Strongly agree</i> |

| E3: Work Commitment |                                                                                                               |   |   |   |   |   |
|---------------------|---------------------------------------------------------------------------------------------------------------|---|---|---|---|---|
| B001                | Following health and safety precautions                                                                       | 1 | 2 | 3 | 4 | 5 |
| B002                | Taking appropriate measures to prevent or minimise the risk of injury to oneself                              | 1 | 2 | 3 | 4 | 5 |
| B003                | Taking appropriate measures to prevent or minimise the risk of injury to patients                             | 1 | 2 | 3 | 4 | 5 |
| B004                | Adhering to the regulation of patients' and families' confidentiality                                         | 1 | 2 | 3 | 4 | 5 |
| B005                | Adhering to ethical and legal standards of practice                                                           | 1 | 2 | 3 | 4 | 5 |
| B006                | Maintaining appropriate appearance, attire, and conduct                                                       | 1 | 2 | 3 | 4 | 5 |
| B007                | Assisting activities and mobility, and changing position                                                      | 1 | 2 | 3 | 4 | 5 |
| E2: Self-Bieleve    |                                                                                                               |   |   |   |   |   |
| B011                | Communicating verbally with precise and appropriate terminology in a timely manner with patients and families | 1 | 2 | 3 | 4 | 5 |
| B012                | Educating patients or families with disease-related care knowledge                                            | 1 | 2 | 3 | 4 | 5 |
| B013                | Providing emotional and psychosocial support                                                                  | 1 | 2 | 3 | 4 | 5 |

**Thank you for your cooperation**
